# Supplementary material for: Tissue‐Specific Metabolic Profiles After Prolonged Cardiac Arrest Reveal Brain Metabolome Dysfunction Predominantly After Resuscitation
Source: PubMed Central journal article supplement — J Am Heart Assoc. 2019 Aug 31;8(17):e012809. doi: 10.1161/JAHA.119.012809 (PMC6755859; doi:10.1161/jaha.119.012809), 2019-08-31
Supplement: JAH3-8-e012809-s001.pdf [file JAH3-8-e012809-s001.pdf]

# **Supplemental Material**

**Table S1. Pathway Analysis of brain tissue comparing control with cardiac arrest.**

| Pathways                                            | Total Compounds | Hits | Raw p     | neg log p-value | Holm adjust. | FDR      | neg log FDR | Impact  |
|-----------------------------------------------------|-----------------|------|-----------|-----------------|--------------|----------|-------------|---------|
| Aminoacyl-tRNA biosynthesis                         | 75              | 18   | 0.0015988 | 6.4385          | 0.086336     | 0.056429 | 1.25        | 0.22536 |
| D-Arginine and D-ornithine metabolism               | 8               | 2    | 0.0031192 | 5.7702          | 0.16532      | 0.056429 | 1.25        | 0       |
| Valine, leucine and isoleucine biosynthesis         | 27              | 4    | 0.0057138 | 5.1649          | 0.29712      | 0.056429 | 1.25        | 0.0265  |
| Arginine and proline metabolism                     | 77              | 8    | 0.0068467 | 4.984           | 0.34918      | 0.056429 | 1.25        | 0.41398 |
| Glyoxylate and dicarboxylate metabolism             | 50              | 4    | 0.0072827 | 4.9223          | 0.36413      | 0.056429 | 1.25        | 0.02984 |
| Valine, leucine and isoleucine degradation          | 40              | 3    | 0.0081805 | 4.806           | 0.40084      | 0.056429 | 1.25        | 0.0713  |
| Citrate cycle (TCA cycle)                           | 20              | 5    | 0.0086167 | 4.7541          | 0.4136       | 0.056429 | 1.25        | 0.17318 |
| Cysteine and methionine metabolism                  | 56              | 4    | 0.0087825 | 4.735           | 0.4136       | 0.056429 | 1.25        | 0.05003 |
| Pantothenate and CoA biosynthesis                   | 27              | 3    | 0.0094048 | 4.6665          | 0.43262      | 0.056429 | 1.25        | 0.00854 |
| Sphingolipid metabolism                             | 25              | 1    | 0.015619  | 4.1593          | 0.70287      | 0.076676 | 1.12        | 0       |
| Sulfur metabolism                                   | 18              | 1    | 0.015619  | 4.1593          | 0.70287      | 0.076676 | 1.12        | 0       |
| Biotin metabolism                                   | 11              | 1    | 0.051784  | 2.9607          | 1            | 0.21675  | 0.66        | 0       |
| Histidine metabolism                                | 44              | 3    | 0.060211  | 2.8099          | 1            | 0.21675  | 0.66        | 0.14039 |
| Glycine, serine and threonine metabolism            | 48              | 5    | 0.060977  | 2.7973          | 1            | 0.21675  | 0.66        | 0.42039 |
| Propanoate metabolism                               | 35              | 3    | 0.063113  | 2.7628          | 1            | 0.21675  | 0.66        | 0.05474 |
| Cyanoamino acid metabolism                          | 16              | 4    | 0.064222  | 2.7454          | 1            | 0.21675  | 0.66        | 0       |
| Linoleic acid metabolism                            | 15              | 1    | 0.072347  | 2.6263          | 1            | 0.22981  | 0.64        | 0.65625 |
| Purine metabolism                                   | 92              | 7    | 0.093434  | 2.3705          | 1            | 0.2803   | 0.55        | 0.14975 |
| Methane metabolism                                  | 34              | 3    | 0.11281   | 2.1821          | 1            | 0.31754  | 0.50        | 0.05444 |
| beta-Alanine metabolism                             | 28              | 3    | 0.11761   | 2.1404          | 1            | 0.31754  | 0.50        | 0.01119 |
| Lysine degradation                                  | 47              | 3    | 0.13461   | 2.0054          | 1            | 0.3347   | 0.48        | 0.14675 |
| Nitrogen metabolism                                 | 39              | 10   | 0.13636   | 1.9925          | 1            | 0.3347   | 0.48        | 0.0083  |
| alpha-Linolenic acid metabolism                     | 29              | 1    | 0.14809   | 1.91            | 1            | 0.33809  | 0.47        | 0.20335 |
| Tyrosine metabolism                                 | 76              | 3    | 0.15429   | 1.8689          | 1            | 0.33809  | 0.47        | 0.04724 |
| Phenylalanine metabolism                            | 45              | 4    | 0.15652   | 1.8545          | 1            | 0.33809  | 0.47        | 0.11906 |
| Riboflavin metabolism                               | 21              | 2    | 0.17263   | 1.7566          | 1            | 0.35855  | 0.45        | 0       |
| Lysine biosynthesis                                 | 32              | 4    | 0.18201   | 1.7037          | 1            | 0.36401  | 0.44        | 0.15084 |
| Ubiquinone and other terpenoid-quinone biosynthesis | 36              | 1    | 0.18932   | 1.6643          | 1            | 0.36513  | 0.44        | 0       |
| Folate biosynthesis                                 | 42              | 1    | 0.20929   | 1.564           | 1            | 0.37367  | 0.43        | 0       |
| Fatty acid metabolism                               | 50              | 3    | 0.21664   | 1.5295          | 1            | 0.37367  | 0.43        | 0.2426  |
| Butanoate metabolism                                | 40              | 4    | 0.24922   | 1.3894          | 1            | 0.37367  | 0.43        | 0.10672 |

|                                                     |     |   |         |          |   |         |      |         |
|-----------------------------------------------------|-----|---|---------|----------|---|---------|------|---------|
| Synthesis and degradation of ketone bodies          | 6   | 1 | 0.25935 | 1.3496   | 1 | 0.37367 | 0.43 | 0       |
| Inositol phosphate metabolism                       | 39  | 1 | 0.25935 | 1.3496   | 1 | 0.37367 | 0.43 | 0       |
| Terpenoid backbone biosynthesis                     | 33  | 1 | 0.25935 | 1.3496   | 1 | 0.37367 | 0.43 | 0       |
| Phenylalanine, tyrosine and tryptophan biosynthesis | 27  | 3 | 0.27407 | 1.2944   | 1 | 0.37367 | 0.43 | 0.008   |
| Porphyrin and chlorophyll metabolism                | 104 | 3 | 0.2757  | 1.2884   | 1 | 0.37367 | 0.43 | 0       |
| Taurine and hypotaurine metabolism                  | 20  | 2 | 0.27959 | 1.2744   | 1 | 0.37367 | 0.43 | 0.03237 |
| Pyruvate metabolism                                 | 32  | 2 | 0.28167 | 1.267    | 1 | 0.37367 | 0.43 | 0.24876 |
| Glycolysis or Gluconeogenesis                       | 31  | 2 | 0.28188 | 1.2663   | 1 | 0.37367 | 0.43 | 0.04202 |
| Tryptophan metabolism                               | 79  | 2 | 0.28209 | 1.2655   | 1 | 0.37367 | 0.43 | 0.10853 |
| Thiamine metabolism                                 | 24  | 2 | 0.28371 | 1.2598   | 1 | 0.37367 | 0.43 | 0       |
| Fatty acid elongation in mitochondria               | 27  | 2 | 0.36359 | 1.0117   | 1 | 0.46747 | 0.33 | 0.26765 |
| Alanine, aspartate and glutamate metabolism         | 24  | 7 | 0.42249 | 0.86159  | 1 | 0.53057 | 0.28 | 0.75404 |
| Fatty acid biosynthesis                             | 49  | 6 | 0.4651  | 0.76551  | 1 | 0.57005 | 0.24 | 0.0218  |
| Glutathione metabolism                              | 38  | 5 | 0.47504 | 0.74436  | 1 | 0.57005 | 0.24 | 0.02214 |
| Selenoamino acid metabolism                         | 22  | 1 | 0.51559 | 0.66244  | 1 | 0.57347 | 0.24 | 0       |
| Starch and sucrose metabolism                       | 50  | 1 | 0.53711 | 0.62155  | 1 | 0.57347 | 0.24 | 0.01703 |
| Galactose metabolism                                | 41  | 1 | 0.53711 | 0.62155  | 1 | 0.57347 | 0.24 | 0.00276 |
| Pentose phosphate pathway                           | 32  | 1 | 0.53711 | 0.62155  | 1 | 0.57347 | 0.24 | 0       |
| Amino sugar and nucleotide sugar metabolism         | 88  | 1 | 0.53711 | 0.62155  | 1 | 0.57347 | 0.24 | 0       |
| Primary bile acid biosynthesis                      | 47  | 1 | 0.54161 | 0.6132   | 1 | 0.57347 | 0.24 | 0.00822 |
| Nicotinate and nicotinamide metabolism              | 44  | 4 | 0.76801 | 0.26395  | 1 | 0.79755 | 0.10 | 0.0015  |
| Pyrimidine metabolism                               | 60  | 1 | 0.92166 | 0.081574 | 1 | 0.93905 | 0.03 | 0       |
| D-Glutamine and D-glutamate metabolism              | 11  | 2 | 0.97721 | 0.023056 | 1 | 0.97721 | 0.01 | 0.13904 |

**Table S2. Pathway Analysis of brain tissue comparing control with CPB-resuscitation.**

| Pathways                                            | Total Compounds | Hits | Raw p     | neg log p-value | Holm adjust. | FDR        | neg log FDR | Impact  |
|-----------------------------------------------------|-----------------|------|-----------|-----------------|--------------|------------|-------------|---------|
| Alanine, aspartate, and glutamate metabolism        | 24              | 7    | 3.04E-08  | 17.31           | 1.64E-06     | 8.22E-07   | 6.09        | 0.75404 |
| Histidine metabolism                                | 44              | 3    | 3.04E-08  | 17.307          | 1.64E-06     | 8.22E-07   | 6.09        | 0.14039 |
| Arginine and proline metabolism                     | 77              | 8    | 5.05E-08  | 16.801          | 2.63E-06     | 9.09E-07   | 6.04        | 0.41398 |
| Nitrogen metabolism                                 | 39              | 10   | 1.64E-07  | 15.621          | 8.38E-06     | 2.22E-06   | 5.65        | 0.0083  |
| Pantothenate and CoA biosynthesis                   | 27              | 3    | 6.14E-07  | 14.304          | 3.07E-05     | 5.49E-06   | 5.26        | 0.00854 |
| D-Glutamine and D-glutamate metabolism              | 11              | 2    | 6.49E-07  | 14.247          | 3.18E-05     | 5.49E-06   | 5.26        | 0.13904 |
| Aminoacyl-tRNA biosynthesis                         | 75              | 18   | 7.11E-07  | 14.156          | 3.41E-05     | 5.49E-06   | 5.26        | 0.22536 |
| Phenylalanine metabolism                            | 45              | 4    | 3.12E-06  | 12.677          | 0.00014675   | 2.11E-05   | 4.68        | 0.11906 |
| Phenylalanine, tyrosine and tryptophan biosynthesis | 27              | 3    | 3.97E-06  | 12.437          | 0.00018248   | 2.22E-05   | 4.65        | 0.008   |
| Valine, leucine and isoleucine degradation          | 40              | 3    | 4.11E-06  | 12.403          | 0.00018473   | 2.22E-05   | 4.65        | 0.0713  |
| Valine, leucine and isoleucine biosynthesis         | 27              | 4    | 5.81E-06  | 12.056          | 0.00025573   | 2.85E-05   | 4.54        | 0.0265  |
| Porphyrin and chlorophyll metabolism                | 104             | 3    | 2.17E-05  | 10.74           | 0.00093113   | 9.74E-05   | 4.01        | 0       |
| Glycine, serine and threonine metabolism            | 48              | 5    | 7.57E-05  | 9.4892          | 0.0031778    | 0.00031429 | 3.50        | 0.42039 |
| Pyrimidine metabolism                               | 60              | 1    | 9.27E-05  | 9.2861          | 0.003801     | 0.00034339 | 3.46        | 0       |
| beta-Alanine metabolism                             | 28              | 3    | 9.54E-05  | 9.2576          | 0.0038154    | 0.00034339 | 3.46        | 0.01119 |
| D-Arginine and D-ornithine metabolism               | 8               | 2    | 0.0001725 | 8.6653          | 0.0067262    | 0.00058207 | 3.24        | 0       |
| Propanoate metabolism                               | 35              | 3    | 0.0001857 | 8.5912          | 0.0070579    | 0.00058998 | 3.23        | 0.05474 |
| Cyanoamino acid metabolism                          | 16              | 4    | 0.0002083 | 8.4765          | 0.0077074    | 0.00062492 | 3.20        | 0       |
| Cysteine and methionine metabolism                  | 56              | 4    | 0.0005912 | 7.4334          | 0.021283     | 0.0016802  | 2.77        | 0.05003 |
| Sphingolipid metabolism                             | 25              | 1    | 0.0020402 | 6.1947          | 0.071409     | 0.0052463  | 2.28        | 0       |
| Sulfur metabolism                                   | 18              | 1    | 0.0020402 | 6.1947          | 0.071409     | 0.0052463  | 2.28        | 0       |
| Ubiquinone and other terpenoid-quinone biosynthesis | 36              | 1    | 0.0021408 | 6.1466          | 0.071409     | 0.0052546  | 2.28        | 0       |
| Thiamine metabolism                                 | 24              | 2    | 0.0026805 | 5.9217          | 0.085777     | 0.0062934  | 2.20        | 0       |
| Biotin metabolism                                   | 11              | 1    | 0.0041962 | 5.4736          | 0.13008      | 0.0094415  | 2.02        | 0       |
| alpha-Linolenic acid metabolism                     | 29              | 1    | 0.0071137 | 4.9457          | 0.21341      | 0.014865   | 1.83        | 0.20335 |
| Tyrosine metabolism                                 | 76              | 3    | 0.0071573 | 4.9396          | 0.21341      | 0.014865   | 1.83        | 0.04724 |
| Glutathione metabolism                              | 38              | 5    | 0.0080413 | 4.8232          | 0.22516      | 0.016083   | 1.79        | 0.02214 |
| Lysine biosynthesis                                 | 32              | 4    | 0.0084714 | 4.7711          | 0.22873      | 0.016338   | 1.79        | 0.15084 |
| Purine metabolism                                   | 92              | 7    | 0.010977  | 4.5119          | 0.28541      | 0.020441   | 1.69        | 0.14975 |
| Primary bile acid biosynthesis                      | 47              | 1    | 0.015356  | 4.1762          | 0.3839       | 0.027641   | 1.56        | 0.00822 |
| Fatty acid metabolism                               | 50              | 3    | 0.027515  | 3.593           | 0.66035      | 0.047929   | 1.32        | 0.2426  |

|                                             |    |   |          |         |         |          |      |         |
|---------------------------------------------|----|---|----------|---------|---------|----------|------|---------|
| Lysine degradation                          | 47 | 3 | 0.029995 | 3.5067  | 0.68989 | 0.050617 | 1.30 | 0.14675 |
| Methane metabolism                          | 34 | 3 | 0.047709 | 3.0426  | 1       | 0.07807  | 1.11 | 0.05444 |
| Linoleic acid metabolism                    | 15 | 1 | 0.053804 | 2.9224  | 1       | 0.085454 | 1.07 | 0.65625 |
| Butanoate metabolism                        | 40 | 4 | 0.080677 | 2.5173  | 1       | 0.12447  | 0.90 | 0.10672 |
| Nicotinate and nicotinamide metabolism      | 44 | 4 | 0.10798  | 2.2258  | 1       | 0.16197  | 0.79 | 0.0015  |
| Selenoamino acid metabolism                 | 22 | 1 | 0.11581  | 2.1558  | 1       | 0.16902  | 0.77 | 0       |
| Riboflavin metabolism                       | 21 | 2 | 0.12698  | 2.0637  | 1       | 0.18044  | 0.74 | 0       |
| Folate biosynthesis                         | 42 | 1 | 0.14637  | 1.9216  | 1       | 0.20267  | 0.69 | 0       |
| Tryptophan metabolism                       | 79 | 2 | 0.17739  | 1.7294  | 1       | 0.23948  | 0.62 | 0.10853 |
| Starch and sucrose metabolism               | 50 | 1 | 0.35529  | 1.0348  | 1       | 0.43603  | 0.36 | 0.01703 |
| Galactose metabolism                        | 41 | 1 | 0.35529  | 1.0348  | 1       | 0.43603  | 0.36 | 0.00276 |
| Pentose phosphate pathway                   | 32 | 1 | 0.35529  | 1.0348  | 1       | 0.43603  | 0.36 | 0       |
| Amino sugar and nucleotide sugar metabolism | 88 | 1 | 0.35529  | 1.0348  | 1       | 0.43603  | 0.36 | 0       |
| Pyruvate metabolism                         | 32 | 2 | 0.3971   | 0.92357 | 1       | 0.47652  | 0.32 | 0.24876 |
| Taurine and hypotaurine metabolism          | 20 | 2 | 0.52013  | 0.65368 | 1       | 0.61059  | 0.21 | 0.03237 |
| Citrate cycle (TCA cycle)                   | 20 | 5 | 0.57655  | 0.5507  | 1       | 0.66242  | 0.18 | 0.17318 |
| Glycolysis or Gluconeogenesis               | 31 | 2 | 0.73106  | 0.31326 | 1       | 0.77708  | 0.11 | 0.04202 |
| Synthesis and degradation of ketone bodies  | 6  | 1 | 0.73391  | 0.30937 | 1       | 0.77708  | 0.11 | 0       |
| Inositol phosphate metabolism               | 39 | 1 | 0.73391  | 0.30937 | 1       | 0.77708  | 0.11 | 0       |
| Terpenoid backbone biosynthesis             | 33 | 1 | 0.73391  | 0.30937 | 1       | 0.77708  | 0.11 | 0       |
| Glyoxylate and dicarboxylate metabolism     | 50 | 4 | 0.76612  | 0.26642 | 1       | 0.79558  | 0.10 | 0.02984 |
| Fatty acid biosynthesis                     | 49 | 6 | 0.83257  | 0.18324 | 1       | 0.84669  | 0.07 | 0.0218  |
| Fatty acid elongation in mitochondria       | 27 | 2 | 0.84669  | 0.16642 | 1       | 0.84669  | 0.07 | 0.26765 |

**Table S3. Pathway Analysis of heart tissue comparing control with cardiac arrest.**

| Pathways                                            | Total Compounds | Hits | Raw p      | neg log p-value | Holm adjust. | FDR      | neg log FDR | Impact  |
|-----------------------------------------------------|-----------------|------|------------|-----------------|--------------|----------|-------------|---------|
| Tyrosine metabolism                                 | 76              | 3    | 0.00050009 | 7.6007          | 0.027005     | 0.014416 | 1.84        | 0.04724 |
| Phenylalanine metabolism                            | 45              | 4    | 0.00077928 | 7.1571          | 0.041302     | 0.014416 | 1.84        | 0.11906 |
| Alanine, aspartate and glutamate metabolism         | 24              | 7    | 0.00080088 | 7.1298          | 0.041646     | 0.014416 | 1.84        | 0.75404 |
| Citrate cycle (TCA cycle)                           | 20              | 5    | 0.0011822  | 6.7404          | 0.060292     | 0.01596  | 1.80        | 0.17318 |
| Butanoate metabolism                                | 40              | 4    | 0.0016825  | 6.3875          | 0.084126     | 0.018171 | 1.74        | 0.10672 |
| Nicotinate and nicotinamide metabolism              | 44              | 4    | 0.0022504  | 6.0966          | 0.11027      | 0.020254 | 1.69        | 0.0015  |
| Glyoxylate and dicarboxylate metabolism             | 50              | 4    | 0.0031708  | 5.7538          | 0.1522       | 0.024387 | 1.61        | 0.02984 |
| Propanoate metabolism                               | 35              | 3    | 0.0036129  | 5.6233          | 0.1698       | 0.024387 | 1.61        | 0.05474 |
| Folate biosynthesis                                 | 42              | 1    | 0.0076924  | 4.8675          | 0.35385      | 0.046154 | 1.34        | 0       |
| Arginine and proline metabolism                     | 77              | 8    | 0.016139   | 4.1265          | 0.72626      | 0.087151 | 1.06        | 0.41398 |
| Riboflavin metabolism                               | 21              | 2    | 0.031855   | 3.4466          | 1            | 0.15638  | 0.81        | 0       |
| Glycine, serine and threonine metabolism            | 48              | 5    | 0.042672   | 3.1542          | 1            | 0.16665  | 0.78        | 0.42039 |
| Lysine biosynthesis                                 | 32              | 4    | 0.044959   | 3.102           | 1            | 0.16665  | 0.78        | 0.15084 |
| Histidine metabolism                                | 44              | 3    | 0.045349   | 3.0934          | 1            | 0.16665  | 0.78        | 0.14039 |
| Porphyrin and chlorophyll metabolism                | 104             | 3    | 0.047422   | 3.0487          | 1            | 0.16665  | 0.78        | 0       |
| Aminoacyl-tRNA biosynthesis                         | 75              | 18   | 0.049734   | 3.0011          | 1            | 0.16665  | 0.78        | 0.22536 |
| Pantothenate and CoA biosynthesis                   | 27              | 3    | 0.052463   | 2.9476          | 1            | 0.16665  | 0.78        | 0.00854 |
| Fatty acid biosynthesis                             | 49              | 6    | 0.060572   | 2.8039          | 1            | 0.18171  | 0.74        | 0.0218  |
| Valine, leucine and isoleucine biosynthesis         | 27              | 4    | 0.070053   | 2.6585          | 1            | 0.1991   | 0.70        | 0.0265  |
| Purine metabolism                                   | 92              | 7    | 0.083485   | 2.4831          | 1            | 0.22541  | 0.65        | 0.14975 |
| Cysteine and methionine metabolism                  | 56              | 4    | 0.092977   | 2.3754          | 1            | 0.23802  | 0.62        | 0.05003 |
| Phenylalanine, tyrosine and tryptophan biosynthesis | 27              | 3    | 0.1        | 2.3026          | 1            | 0.23802  | 0.62        | 0.008   |
| Pyruvate metabolism                                 | 32              | 2    | 0.10138    | 2.2889          | 1            | 0.23802  | 0.62        | 0.24876 |
| Glutathione metabolism                              | 38              | 5    | 0.1102     | 2.2055          | 1            | 0.24795  | 0.61        | 0.02214 |
| beta-Alanine metabolism                             | 28              | 3    | 0.14264    | 1.9475          | 1            | 0.28327  | 0.55        | 0.01119 |
| Selenoamino acid metabolism                         | 22              | 1    | 0.14519    | 1.9297          | 1            | 0.28327  | 0.55        | 0       |
| Valine, leucine and isoleucine degradation          | 40              | 3    | 0.14551    | 1.9275          | 1            | 0.28327  | 0.55        | 0.0713  |
| D-Arginine and D-ornithine metabolism               | 8               | 2    | 0.14688    | 1.9181          | 1            | 0.28327  | 0.55        | 0       |
| Fatty acid elongation in mitochondria               | 27              | 2    | 0.15625    | 1.8563          | 1            | 0.29094  | 0.54        | 0.26765 |
| Fatty acid metabolism                               | 50              | 3    | 0.16499    | 1.8019          | 1            | 0.29699  | 0.53        | 0.2426  |
| Tryptophan metabolism                               | 79              | 2    | 0.21296    | 1.5466          | 1            | 0.37097  | 0.43        | 0.10853 |

|                                                     |    |    |         |         |   |         |      |         |
|-----------------------------------------------------|----|----|---------|---------|---|---------|------|---------|
| Taurine and hypotaurine metabolism                  | 20 | 2  | 0.23192 | 1.4613  | 1 | 0.38209 | 0.42 | 0.03237 |
| Cyanoamino acid metabolism                          | 16 | 4  | 0.24901 | 1.3902  | 1 | 0.38209 | 0.42 | 0       |
| Linoleic acid metabolism                            | 15 | 1  | 0.25259 | 1.376   | 1 | 0.38209 | 0.42 | 0.65625 |
| Glycolysis or Gluconeogenesis                       | 31 | 2  | 0.27066 | 1.3069  | 1 | 0.38209 | 0.42 | 0.04202 |
| Synthesis and degradation of ketone bodies          | 6  | 1  | 0.2709  | 1.306   | 1 | 0.38209 | 0.42 | 0       |
| Inositol phosphate metabolism                       | 39 | 1  | 0.2709  | 1.306   | 1 | 0.38209 | 0.42 | 0       |
| Terpenoid backbone biosynthesis                     | 33 | 1  | 0.2709  | 1.306   | 1 | 0.38209 | 0.42 | 0       |
| Nitrogen metabolism                                 | 39 | 10 | 0.28481 | 1.2559  | 1 | 0.38209 | 0.42 | 0.0083  |
| Starch and sucrose metabolism                       | 50 | 1  | 0.30425 | 1.1899  | 1 | 0.38209 | 0.42 | 0.01703 |
| Galactose metabolism                                | 41 | 1  | 0.30425 | 1.1899  | 1 | 0.38209 | 0.42 | 0.00276 |
| Pentose phosphate pathway                           | 32 | 1  | 0.30425 | 1.1899  | 1 | 0.38209 | 0.42 | 0       |
| Amino sugar and nucleotide sugar metabolism         | 88 | 1  | 0.30425 | 1.1899  | 1 | 0.38209 | 0.42 | 0       |
| Ubiquinone and other terpenoid-quinone biosynthesis | 36 | 1  | 0.33483 | 1.0941  | 1 | 0.41093 | 0.39 | 0       |
| Lysine degradation                                  | 47 | 3  | 0.36126 | 1.0182  | 1 | 0.43351 | 0.36 | 0.14675 |
| Methane metabolism                                  | 34 | 3  | 0.40722 | 0.89839 | 1 | 0.47804 | 0.32 | 0.05444 |
| D-Glutamine and D-glutamate metabolism              | 11 | 2  | 0.45129 | 0.79565 | 1 | 0.5185  | 0.29 | 0.13904 |
| Primary bile acid biosynthesis                      | 47 | 1  | 0.46768 | 0.75997 | 1 | 0.52614 | 0.28 | 0.00822 |
| Thiamine metabolism                                 | 24 | 2  | 0.5079  | 0.67746 | 1 | 0.54974 | 0.26 | 0       |
| Sphingolipid metabolism                             | 25 | 1  | 0.5192  | 0.65547 | 1 | 0.54974 | 0.26 | 0       |
| Sulfur metabolism                                   | 18 | 1  | 0.5192  | 0.65547 | 1 | 0.54974 | 0.26 | 0       |
| Biotin metabolism                                   | 11 | 1  | 0.65132 | 0.42875 | 1 | 0.67637 | 0.17 | 0       |
| alpha-Linolenic acid metabolism                     | 29 | 1  | 0.79122 | 0.23419 | 1 | 0.80614 | 0.09 | 0.20335 |
| Pyrimidine metabolism                               | 60 | 1  | 0.84144 | 0.17264 | 1 | 0.84144 | 0.07 | 0       |

**Table S4. Pathway Analysis of heart tissue comparing control with CPB-resuscitation.**

| Pathways                                            | Total Compounds | Hits | Raw p     | neg log p-value | Holm adjust. | FDR      | neg log FDR | Impact  |
|-----------------------------------------------------|-----------------|------|-----------|-----------------|--------------|----------|-------------|---------|
| Aminoacyl-tRNA biosynthesis                         | 75              | 18   | 0.0004338 | 7.7429          | 0.023425     | 0.023425 | 1.63        | 0.22536 |
| Citrate cycle (TCA cycle)                           | 20              | 5    | 0.001377  | 6.5879          | 0.072981     | 0.028344 | 1.55        | 0.17318 |
| Phenylalanine, tyrosine and tryptophan biosynthesis | 27              | 3    | 0.0015747 | 6.4537          | 0.081882     | 0.028344 | 1.55        | 0.008   |
| Glycine, serine and threonine metabolism            | 48              | 5    | 0.0022435 | 6.0997          | 0.11442      | 0.030287 | 1.52        | 0.42039 |
| Phenylalanine metabolism                            | 45              | 4    | 0.0028398 | 5.864           | 0.14199      | 0.03067  | 1.51        | 0.11906 |
| Tyrosine metabolism                                 | 76              | 3    | 0.0034882 | 5.6584          | 0.17092      | 0.031394 | 1.50        | 0.04724 |
| Glyoxylate and dicarboxylate metabolism             | 50              | 4    | 0.0044446 | 5.4161          | 0.21334      | 0.031475 | 1.50        | 0.02984 |
| Arginine and proline metabolism                     | 77              | 8    | 0.0049982 | 5.2987          | 0.23492      | 0.031475 | 1.50        | 0.41398 |
| Alanine, aspartate and glutamate metabolism         | 24              | 7    | 0.0052458 | 5.2503          | 0.24131      | 0.031475 | 1.50        | 0.75404 |
| Nicotinate and nicotinamide metabolism              | 44              | 4    | 0.0062718 | 5.0717          | 0.28223      | 0.031614 | 1.50        | 0.0015  |
| Butanoate metabolism                                | 40              | 4    | 0.0064399 | 5.0452          | 0.28335      | 0.031614 | 1.50        | 0.10672 |
| Propanoate metabolism                               | 35              | 3    | 0.018371  | 3.997           | 0.78994      | 0.082668 | 1.08        | 0.05474 |
| Histidine metabolism                                | 44              | 3    | 0.020399  | 3.8923          | 0.85674      | 0.084654 | 1.07        | 0.14039 |
| Porphyrin and chlorophyll metabolism                | 104             | 3    | 0.021947  | 3.8191          | 0.89984      | 0.084654 | 1.07        | 0       |
| Nitrogen metabolism                                 | 39              | 10   | 0.039178  | 3.2396          | 1            | 0.14104  | 0.85        | 0.0083  |
| Lysine biosynthesis                                 | 32              | 4    | 0.063211  | 2.7613          | 1            | 0.20437  | 0.69        | 0.15084 |
| Fatty acid biosynthesis                             | 49              | 6    | 0.06548   | 2.726           | 1            | 0.20437  | 0.69        | 0.0218  |
| Tryptophan metabolism                               | 79              | 2    | 0.068124  | 2.6864          | 1            | 0.20437  | 0.69        | 0.10853 |
| Pyruvate metabolism                                 | 32              | 2    | 0.075766  | 2.5801          | 1            | 0.21533  | 0.67        | 0.24876 |
| Valine, leucine and isoleucine biosynthesis         | 27              | 4    | 0.10004   | 2.3022          | 1            | 0.2701   | 0.57        | 0.0265  |
| beta-Alanine metabolism                             | 28              | 3    | 0.13293   | 2.0179          | 1            | 0.34182  | 0.47        | 0.01119 |
| Purine metabolism                                   | 92              | 7    | 0.17949   | 1.7176          | 1            | 0.41767  | 0.38        | 0.14975 |
| D-Arginine and D-ornithine metabolism               | 8               | 2    | 0.18302   | 1.6982          | 1            | 0.41767  | 0.38        | 0       |
| Pantothenate and CoA biosynthesis                   | 27              | 3    | 0.18563   | 1.684           | 1            | 0.41767  | 0.38        | 0.00854 |
| Valine, leucine and isoleucine degradation          | 40              | 3    | 0.2139    | 1.5422          | 1            | 0.43785  | 0.36        | 0.0713  |
| Fatty acid elongation in mitochondria               | 27              | 2    | 0.22185   | 1.5057          | 1            | 0.43785  | 0.36        | 0.26765 |
| Cyanoamino acid metabolism                          | 16              | 4    | 0.22387   | 1.4967          | 1            | 0.43785  | 0.36        | 0       |
| Sphingolipid metabolism                             | 25              | 1    | 0.23519   | 1.4474          | 1            | 0.43785  | 0.36        | 0       |
| Sulfur metabolism                                   | 18              | 1    | 0.23519   | 1.4474          | 1            | 0.43785  | 0.36        | 0       |
| Primary bile acid biosynthesis                      | 47              | 1    | 0.24567   | 1.4038          | 1            | 0.43785  | 0.36        | 0.00822 |
| Cysteine and methionine metabolism                  | 56              | 4    | 0.25136   | 1.3809          | 1            | 0.43785  | 0.36        | 0.05003 |



|                                                     |    |   |         |           |   |         |      |         |
|-----------------------------------------------------|----|---|---------|-----------|---|---------|------|---------|
| Linoleic acid metabolism                            | 15 | 1 | 0.26776 | 1.3177    | 1 | 0.45184 | 0.35 | 0.65625 |
| Fatty acid metabolism                               | 50 | 3 | 0.30564 | 1.1853    | 1 | 0.48348 | 0.32 | 0.2426  |
| Thiamine metabolism                                 | 24 | 2 | 0.32367 | 1.128     | 1 | 0.48348 | 0.32 | 0       |
| Methane metabolism                                  | 34 | 3 | 0.33081 | 1.1062    | 1 | 0.48348 | 0.32 | 0.05444 |
| D-Glutamine and D-glutamate metabolism              | 11 | 2 | 0.33267 | 1.1006    | 1 | 0.48348 | 0.32 | 0.13904 |
| Synthesis and degradation of ketone bodies          | 6  | 1 | 0.34918 | 1.0522    | 1 | 0.48348 | 0.32 | 0       |
| Inositol phosphate metabolism                       | 39 | 1 | 0.34918 | 1.0522    | 1 | 0.48348 | 0.32 | 0       |
| Terpenoid backbone biosynthesis                     | 33 | 1 | 0.34918 | 1.0522    | 1 | 0.48348 | 0.32 | 0       |
| Selenoamino acid metabolism                         | 22 | 1 | 0.36554 | 1.0064    | 1 | 0.49085 | 0.31 | 0       |
| Taurine and hypotaurine metabolism                  | 20 | 2 | 0.37268 | 0.98703   | 1 | 0.49085 | 0.31 | 0.03237 |
| alpha-Linolenic acid metabolism                     | 29 | 1 | 0.38472 | 0.95523   | 1 | 0.49464 | 0.31 | 0.20335 |
| Glutathione metabolism                              | 38 | 5 | 0.40752 | 0.89766   | 1 | 0.51177 | 0.29 | 0.02214 |
| Glycolysis or Gluconeogenesis                       | 31 | 2 | 0.43042 | 0.84299   | 1 | 0.52825 | 0.28 | 0.04202 |
| Lysine degradation                                  | 47 | 3 | 0.44394 | 0.81208   | 1 | 0.53272 | 0.27 | 0.14675 |
| Ubiquinone and other terpenoid-quinone biosynthesis | 36 | 1 | 0.5504  | 0.59712   | 1 | 0.64612 | 0.19 | 0       |
| Pyrimidine metabolism                               | 60 | 1 | 0.67742 | 0.38947   | 1 | 0.77831 | 0.11 | 0       |
| Riboflavin metabolism                               | 21 | 2 | 0.77618 | 0.25337   | 1 | 0.8732  | 0.06 | 0       |
| Folate biosynthesis                                 | 42 | 1 | 0.8495  | 0.16311   | 1 | 0.93618 | 0.03 | 0       |
| Starch and sucrose metabolism                       | 50 | 1 | 0.98214 | 0.018023  | 1 | 0.99254 | 0.00 | 0.01703 |
| Galactose metabolism                                | 41 | 1 | 0.98214 | 0.018023  | 1 | 0.99254 | 0.00 | 0.00276 |
| Pentose phosphate pathway                           | 32 | 1 | 0.98214 | 0.018023  | 1 | 0.99254 | 0.00 | 0       |
| Amino sugar and nucleotide sugar metabolism         | 88 | 1 | 0.98214 | 0.018023  | 1 | 0.99254 | 0.00 | 0       |
| Biotin metabolism                                   | 11 | 1 | 0.99254 | 0.0074851 | 1 | 0.99254 | 0.00 | 0       |

**Table S5. Pathway Analysis of kidney tissue comparing control with cardiac arrest.**

| Pathways                                            | Total Compounds | Hits | Raw p      | neg log p-value | Holm adjust. | FDR      | neg log FDR | Impact  |
|-----------------------------------------------------|-----------------|------|------------|-----------------|--------------|----------|-------------|---------|
| Lysine biosynthesis                                 | 32              | 4    | 0.00029101 | 8.1422          | 0.015714     | 0.01002  | 2.00        | 0.15084 |
| Purine metabolism                                   | 92              | 7    | 0.00037111 | 7.899           | 0.019669     | 0.01002  | 2.00        | 0.14975 |
| Nitrogen metabolism                                 | 39              | 10   | 0.0019227  | 6.254           | 0.099982     | 0.019234 | 1.72        | 0.0083  |
| Phenylalanine metabolism                            | 45              | 4    | 0.0019415  | 6.2443          | 0.099982     | 0.019234 | 1.72        | 0.11906 |
| Arginine and proline metabolism                     | 77              | 8    | 0.0029826  | 5.815           | 0.14913      | 0.019234 | 1.72        | 0.41398 |
| D-Arginine and D-ornithine metabolism               | 8               | 2    | 0.003111   | 5.7728          | 0.15244      | 0.019234 | 1.72        | 0       |
| Nicotinate and nicotinamide metabolism              | 44              | 4    | 0.0031628  | 5.7563          | 0.15244      | 0.019234 | 1.72        | 0.0015  |
| Pyrimidine metabolism                               | 60              | 1    | 0.0033124  | 5.7101          | 0.15568      | 0.019234 | 1.72        | 0       |
| Phenylalanine, tyrosine and tryptophan biosynthesis | 27              | 3    | 0.0042203  | 5.4678          | 0.19414      | 0.019234 | 1.72        | 0.008   |
| Cysteine and methionine metabolism                  | 56              | 4    | 0.0046097  | 5.3796          | 0.20744      | 0.019234 | 1.72        | 0.05003 |
| Aminoacyl-tRNA biosynthesis                         | 75              | 18   | 0.0049735  | 5.3036          | 0.21883      | 0.019234 | 1.72        | 0.22536 |
| Glycine, serine and threonine metabolism            | 48              | 5    | 0.0051371  | 5.2713          | 0.22089      | 0.019234 | 1.72        | 0.42039 |
| Sphingolipid metabolism                             | 25              | 1    | 0.0051425  | 5.2702          | 0.22089      | 0.019234 | 1.72        | 0       |
| Sulfur metabolism                                   | 18              | 1    | 0.0051425  | 5.2702          | 0.22089      | 0.019234 | 1.72        | 0       |
| Cyanoamino acid metabolism                          | 16              | 4    | 0.0053427  | 5.232           | 0.22089      | 0.019234 | 1.72        | 0       |
| Ubiquinone and other terpenoid-quinone biosynthesis | 36              | 1    | 0.0062803  | 5.0703          | 0.24493      | 0.021196 | 1.67        | 0       |
| Thiamine metabolism                                 | 24              | 2    | 0.0080993  | 4.816           | 0.30777      | 0.025727 | 1.59        | 0       |
| Biotin metabolism                                   | 11              | 1    | 0.010296   | 4.576           | 0.38094      | 0.030358 | 1.52        | 0       |
| D-Glutamine and D-glutamate metabolism              | 11              | 2    | 0.010825   | 4.5259          | 0.3897       | 0.030358 | 1.52        | 0.13904 |
| Alanine, aspartate and glutamate metabolism         | 24              | 7    | 0.011244   | 4.488           | 0.39352      | 0.030358 | 1.52        | 0.75404 |
| beta-Alanine metabolism                             | 28              | 3    | 0.01639    | 4.1111          | 0.55728      | 0.042147 | 1.38        | 0.01119 |
| Methane metabolism                                  | 34              | 3    | 0.018866   | 3.9704          | 0.62257      | 0.046307 | 1.33        | 0.05444 |
| Lysine degradation                                  | 47              | 3    | 0.021418   | 3.8435          | 0.68537      | 0.049361 | 1.31        | 0.14675 |
| Glutathione metabolism                              | 38              | 5    | 0.021938   | 3.8195          | 0.68537      | 0.049361 | 1.31        | 0.02214 |
| Primary bile acid biosynthesis                      | 47              | 1    | 0.023866   | 3.7353          | 0.71597      | 0.05155  | 1.29        | 0.00822 |
| Histidine metabolism                                | 44              | 3    | 0.028995   | 3.5406          | 0.84086      | 0.060221 | 1.22        | 0.14039 |
| Tryptophan metabolism                               | 79              | 2    | 0.030189   | 3.5003          | 0.8453       | 0.060378 | 1.22        | 0.10853 |
| Fatty acid metabolism                               | 50              | 3    | 0.05956    | 2.8208          | 1            | 0.11219  | 0.95        | 0.2426  |
| Tyrosine metabolism                                 | 76              | 3    | 0.06025    | 2.8093          | 1            | 0.11219  | 0.95        | 0.04724 |
| Fatty acid elongation in mitochondria               | 27              | 2    | 0.063273   | 2.7603          | 1            | 0.11389  | 0.94        | 0.26765 |
| Selenoamino acid metabolism                         | 22              | 1    | 0.10571    | 2.2471          | 1            | 0.18413  | 0.73        | 0       |

|                                             |     |   |         |         |   |         |      |         |
|---------------------------------------------|-----|---|---------|---------|---|---------|------|---------|
| Fatty acid biosynthesis                     | 49  | 6 | 0.1154  | 2.1594  | 1 | 0.18756 | 0.73 | 0.0218  |
| Porphyrim and chlorophyll metabolism        | 104 | 3 | 0.11554 | 2.1582  | 1 | 0.18756 | 0.73 | 0       |
| Taurine and hypotaurine metabolism          | 20  | 2 | 0.11809 | 2.1363  | 1 | 0.18756 | 0.73 | 0.03237 |
| Pyruvate metabolism                         | 32  | 2 | 0.13353 | 2.0134  | 1 | 0.20602 | 0.69 | 0.24876 |
| Pantothenate and CoA biosynthesis           | 27  | 3 | 0.17149 | 1.7632  | 1 | 0.24678 | 0.61 | 0.00854 |
| Synthesis and degradation of ketone bodies  | 6   | 1 | 0.17823 | 1.7247  | 1 | 0.24678 | 0.61 | 0       |
| Inositol phosphate metabolism               | 39  | 1 | 0.17823 | 1.7247  | 1 | 0.24678 | 0.61 | 0       |
| Terpenoid backbone biosynthesis             | 33  | 1 | 0.17823 | 1.7247  | 1 | 0.24678 | 0.61 | 0       |
| Valine, leucine and isoleucine biosynthesis | 27  | 4 | 0.19042 | 1.6585  | 1 | 0.25256 | 0.60 | 0.0265  |
| Valine, leucine and isoleucine degradation  | 40  | 3 | 0.19176 | 1.6515  | 1 | 0.25256 | 0.60 | 0.0713  |
| Riboflavin metabolism                       | 21  | 2 | 0.22997 | 1.4698  | 1 | 0.29567 | 0.53 | 0       |
| Glycolysis or Gluconeogenesis               | 31  | 2 | 0.24447 | 1.4087  | 1 | 0.30701 | 0.51 | 0.04202 |
| Citrate cycle (TCA cycle)                   | 20  | 5 | 0.25874 | 1.3519  | 1 | 0.31755 | 0.50 | 0.17318 |
| Glyoxylate and dicarboxylate metabolism     | 50  | 4 | 0.27644 | 1.2858  | 1 | 0.33173 | 0.48 | 0.02984 |
| Butanoate metabolism                        | 40  | 4 | 0.28503 | 1.2551  | 1 | 0.33461 | 0.48 | 0.10672 |
| alpha-Linolenic acid metabolism             | 29  | 1 | 0.42994 | 0.84411 | 1 | 0.49398 | 0.31 | 0.20335 |
| Folate biosynthesis                         | 42  | 1 | 0.55557 | 0.58777 | 1 | 0.62501 | 0.20 | 0       |
| Propanoate metabolism                       | 35  | 3 | 0.63049 | 0.46126 | 1 | 0.69482 | 0.16 | 0.05474 |
| Linoleic acid metabolism                    | 15  | 1 | 0.6887  | 0.37295 | 1 | 0.74379 | 0.13 | 0.65625 |
| Starch and sucrose metabolism               | 50  | 1 | 0.7912  | 0.2342  | 1 | 0.7912  | 0.10 | 0.01703 |
| Galactose metabolism                        | 41  | 1 | 0.7912  | 0.2342  | 1 | 0.7912  | 0.10 | 0.00276 |
| Pentose phosphate pathway                   | 32  | 1 | 0.7912  | 0.2342  | 1 | 0.7912  | 0.10 | 0       |
| Amino sugar and nucleotide sugar metabolism | 88  | 1 | 0.7912  | 0.2342  | 1 | 0.7912  | 0.10 | 0       |

**Table S6. Pathway Analysis of kidney tissue comparing control with CPB-resuscitation.**

| Pathways                                            | Total Compounds | Hits | Raw p      | neg log p-value | Holm adjust. | FDR        | neg log FDR | Impact  |
|-----------------------------------------------------|-----------------|------|------------|-----------------|--------------|------------|-------------|---------|
| Nicotinate and nicotinamide metabolism              | 44              | 4    | 1.24E-06   | 13.601          | 6.69E-05     | 2.29E-05   | 4.64        | 0.0015  |
| Phenylalanine metabolism                            | 45              | 4    | 1.31E-06   | 13.549          | 6.92E-05     | 2.29E-05   | 4.64        | 0.11906 |
| Citrate cycle (TCA cycle)                           | 20              | 5    | 1.37E-06   | 13.498          | 7.14E-05     | 2.29E-05   | 4.64        | 0.17318 |
| Glyoxylate and dicarboxylate metabolism             | 50              | 4    | 1.70E-06   | 13.288          | 8.65E-05     | 2.29E-05   | 4.64        | 0.02984 |
| Tyrosine metabolism                                 | 76              | 3    | 5.19E-06   | 12.169          | 0.00025937   | 4.57E-05   | 4.34        | 0.04724 |
| Alanine, aspartate and glutamate metabolism         | 24              | 7    | 6.08E-06   | 12.011          | 0.00029773   | 4.57E-05   | 4.34        | 0.75404 |
| Cysteine and methionine metabolism                  | 56              | 4    | 6.16E-06   | 11.998          | 0.00029773   | 4.57E-05   | 4.34        | 0.05003 |
| Ubiquinone and other terpenoid-quinone biosynthesis | 36              | 1    | 6.77E-06   | 11.903          | 0.00031811   | 4.57E-05   | 4.34        | 0       |
| Arginine and proline metabolism                     | 77              | 8    | 7.82E-06   | 11.759          | 0.00035981   | 4.69E-05   | 4.33        | 0.41398 |
| Glycine, serine and threonine metabolism            | 48              | 5    | 1.26E-05   | 11.285          | 0.00056494   | 6.78E-05   | 4.17        | 0.42039 |
| Thiamine metabolism                                 | 24              | 2    | 2.26E-05   | 10.698          | 0.00099433   | 0.00011094 | 3.95        | 0       |
| D-Arginine and D-ornithine metabolism               | 8               | 2    | 3.05E-05   | 10.399          | 0.00131      | 0.00013709 | 3.86        | 0       |
| Phenylalanine, tyrosine and tryptophan biosynthesis | 27              | 3    | 3.81E-05   | 10.176          | 0.0015984    | 0.00015809 | 3.80        | 0.008   |
| Tryptophan metabolism                               | 79              | 2    | 7.21E-05   | 9.538           | 0.0029546    | 0.0002635  | 3.58        | 0.10853 |
| Aminoacyl-tRNA biosynthesis                         | 75              | 18   | 7.32E-05   | 9.5224          | 0.0029546    | 0.0002635  | 3.58        | 0.22536 |
| Cyanoamino acid metabolism                          | 16              | 4    | 7.89E-05   | 9.4474          | 0.0030769    | 0.00026627 | 3.57        | 0       |
| Nitrogen metabolism                                 | 39              | 10   | 9.54E-05   | 9.2572          | 0.003626     | 0.0003031  | 3.52        | 0.0083  |
| Lysine biosynthesis                                 | 32              | 4    | 0.00013946 | 8.8777          | 0.00516      | 0.00041837 | 3.38        | 0.15084 |
| Butanoate metabolism                                | 40              | 4    | 0.00019354 | 8.55            | 0.0069676    | 0.00055007 | 3.26        | 0.10672 |
| Glutathione metabolism                              | 38              | 5    | 0.00029348 | 8.1337          | 0.010272     | 0.00077617 | 3.11        | 0.02214 |
| Pyruvate metabolism                                 | 32              | 2    | 0.00031232 | 8.0715          | 0.010619     | 0.00077617 | 3.11        | 0.24876 |
| Primary bile acid biosynthesis                      | 47              | 1    | 0.00031622 | 8.0591          | 0.010619     | 0.00077617 | 3.11        | 0.00822 |
| Histidine metabolism                                | 44              | 3    | 0.00041597 | 7.7849          | 0.013311     | 0.00097662 | 3.01        | 0.14039 |
| Sphingolipid metabolism                             | 25              | 1    | 0.001126   | 6.7891          | 0.034905     | 0.0024321  | 2.61        | 0       |
| Sulfur metabolism                                   | 18              | 1    | 0.001126   | 6.7891          | 0.034905     | 0.0024321  | 2.61        | 0       |
| Porphyryn and chlorophyll metabolism                | 104             | 3    | 0.0013803  | 6.5855          | 0.040028     | 0.0028158  | 2.55        | 0       |
| beta-Alanine metabolism                             | 28              | 3    | 0.0014079  | 6.5656          | 0.040028     | 0.0028158  | 2.55        | 0.01119 |
| Methane metabolism                                  | 34              | 3    | 0.001669   | 6.3956          | 0.045062     | 0.0031553  | 2.50        | 0.05444 |
| Fatty acid metabolism                               | 50              | 3    | 0.0016945  | 6.3804          | 0.045062     | 0.0031553  | 2.50        | 0.2426  |
| alpha-Linolenic acid metabolism                     | 29              | 1    | 0.0021024  | 6.1647          | 0.052559     | 0.0037843  | 2.42        | 0.20335 |
| Pantothenate and CoA biosynthesis                   | 27              | 3    | 0.0024915  | 5.9949          | 0.059796     | 0.0043401  | 2.36        | 0.00854 |

|                                             |    |   |           |         |          |           |      |         |
|---------------------------------------------|----|---|-----------|---------|----------|-----------|------|---------|
| Valine, leucine and isoleucine biosynthesis | 27 | 4 | 0.0032559 | 5.7273  | 0.074887 | 0.0054944 | 2.26 | 0.0265  |
| Lysine degradation                          | 47 | 3 | 0.0056789 | 5.171   | 0.12494  | 0.0092927 | 2.03 | 0.14675 |
| Fatty acid elongation in mitochondria       | 27 | 2 | 0.0063416 | 5.0606  | 0.13317  | 0.010072  | 2.00 | 0.26765 |
| Pyrimidine metabolism                       | 60 | 1 | 0.0070059 | 4.961   | 0.14012  | 0.010809  | 1.97 | 0       |
| Purine metabolism                           | 92 | 7 | 0.0078614 | 4.8458  | 0.14937  | 0.011792  | 1.93 | 0.14975 |
| Propanoate metabolism                       | 35 | 3 | 0.0083512 | 4.7853  | 0.15032  | 0.012188  | 1.91 | 0.05474 |
| D-Glutamine and D-glutamate metabolism      | 11 | 2 | 0.010338  | 4.5719  | 0.17574  | 0.014691  | 1.83 | 0.13904 |
| Fatty acid biosynthesis                     | 49 | 6 | 0.019007  | 3.9629  | 0.30412  | 0.026318  | 1.58 | 0.0218  |
| Folate biosynthesis                         | 42 | 1 | 0.022427  | 3.7975  | 0.3364   | 0.030276  | 1.52 | 0       |
| Biotin metabolism                           | 11 | 1 | 0.023189  | 3.7641  | 0.3364   | 0.030542  | 1.52 | 0       |
| Valine, leucine and isoleucine degradation  | 40 | 3 | 0.02687   | 3.6168  | 0.34931  | 0.034547  | 1.46 | 0.0713  |
| Linoleic acid metabolism                    | 15 | 1 | 0.028899  | 3.5439  | 0.34931  | 0.036292  | 1.44 | 0.65625 |
| Synthesis and degradation of ketone bodies  | 6  | 1 | 0.041945  | 3.1714  | 0.46139  | 0.049239  | 1.31 | 0       |
| Inositol phosphate metabolism               | 39 | 1 | 0.041945  | 3.1714  | 0.46139  | 0.049239  | 1.31 | 0       |
| Terpenoid backbone biosynthesis             | 33 | 1 | 0.041945  | 3.1714  | 0.46139  | 0.049239  | 1.31 | 0       |
| Riboflavin metabolism                       | 21 | 2 | 0.050903  | 2.9778  | 0.46139  | 0.058484  | 1.23 | 0       |
| Taurine and hypotaurine metabolism          | 20 | 2 | 0.053481  | 2.9284  | 0.46139  | 0.060166  | 1.22 | 0.03237 |
| Glycolysis or Gluconeogenesis               | 31 | 2 | 0.061534  | 2.7882  | 0.46139  | 0.067813  | 1.17 | 0.04202 |
| Selenoamino acid metabolism                 | 22 | 1 | 0.52693   | 0.64069 | 1        | 0.56908   | 0.24 | 0       |
| Starch and sucrose metabolism               | 50 | 1 | 0.59928   | 0.51203 | 1        | 0.59928   | 0.22 | 0.01703 |
| Galactose metabolism                        | 41 | 1 | 0.59928   | 0.51203 | 1        | 0.59928   | 0.22 | 0.00276 |
| Pentose phosphate pathway                   | 32 | 1 | 0.59928   | 0.51203 | 1        | 0.59928   | 0.22 | 0       |
| Amino sugar and nucleotide sugar metabolism | 88 | 1 | 0.59928   | 0.51203 | 1        | 0.59928   | 0.22 | 0       |

**Table S7. Pathway Analysis of liver tissue comparing control with cardiac arrest.**

| Pathways                                            | Total Compounds | Hits | Raw p     | neg log p-value | Holm adjust. | FDR      | neg log FDR | Impact  |
|-----------------------------------------------------|-----------------|------|-----------|-----------------|--------------|----------|-------------|---------|
| alpha-Linolenic acid metabolism                     | 29              | 1    | 0.0014237 | 6.5545          | 0.076881     | 0.076881 | 1.11        | 0.20335 |
| Linoleic acid metabolism                            | 15              | 1    | 0.0033765 | 5.6909          | 0.17895      | 0.086157 | 1.06        | 0.65625 |
| Fatty acid metabolism                               | 50              | 3    | 0.0047865 | 5.342           | 0.2489       | 0.086157 | 1.06        | 0.2426  |
| Fatty acid biosynthesis                             | 49              | 6    | 0.010908  | 4.5183          | 0.55629      | 0.1337   | 0.87        | 0.0218  |
| Purine metabolism                                   | 92              | 7    | 0.01238   | 4.3917          | 0.61898      | 0.1337   | 0.87        | 0.14975 |
| Fatty acid elongation in mitochondria               | 27              | 2    | 0.019508  | 3.937           | 0.95587      | 0.17557  | 0.76        | 0.26765 |
| Riboflavin metabolism                               | 21              | 2    | 0.023461  | 3.7524          | 1            | 0.18098  | 0.74        | 0       |
| Nicotinate and nicotinamide metabolism              | 44              | 4    | 0.035419  | 3.3405          | 1            | 0.20347  | 0.69        | 0.0015  |
| Pantothenate and CoA biosynthesis                   | 27              | 3    | 0.039067  | 3.2425          | 1            | 0.20347  | 0.69        | 0.00854 |
| Glutathione metabolism                              | 38              | 5    | 0.046815  | 3.0616          | 1            | 0.20347  | 0.69        | 0.02214 |
| Tryptophan metabolism                               | 79              | 2    | 0.05069   | 2.982           | 1            | 0.20347  | 0.69        | 0.10853 |
| Synthesis and degradation of ketone bodies          | 6               | 1    | 0.052752  | 2.9421          | 1            | 0.20347  | 0.69        | 0       |
| Inositol phosphate metabolism                       | 39              | 1    | 0.052752  | 2.9421          | 1            | 0.20347  | 0.69        | 0       |
| Terpenoid backbone biosynthesis                     | 33              | 1    | 0.052752  | 2.9421          | 1            | 0.20347  | 0.69        | 0       |
| Glycolysis or Gluconeogenesis                       | 31              | 2    | 0.064108  | 2.7472          | 1            | 0.23079  | 0.64        | 0.04202 |
| Folate biosynthesis                                 | 42              | 1    | 0.071947  | 2.6318          | 1            | 0.24282  | 0.61        | 0       |
| D-Arginine and D-ornithine metabolism               | 8               | 2    | 0.0914    | 2.3925          | 1            | 0.28787  | 0.54        | 0       |
| Valine, leucine and isoleucine degradation          | 40              | 3    | 0.095956  | 2.3439          | 1            | 0.28787  | 0.54        | 0.0713  |
| Pyruvate metabolism                                 | 32              | 2    | 0.11632   | 2.1514          | 1            | 0.3306   | 0.48        | 0.24876 |
| Propanoate metabolism                               | 35              | 3    | 0.14731   | 1.9152          | 1            | 0.38008  | 0.42        | 0.05474 |
| Valine, leucine and isoleucine biosynthesis         | 27              | 4    | 0.15165   | 1.8862          | 1            | 0.38008  | 0.42        | 0.0265  |
| Ubiquinone and other terpenoid-quinone biosynthesis | 36              | 1    | 0.15485   | 1.8653          | 1            | 0.38008  | 0.42        | 0       |
| Taurine and hypotaurine metabolism                  | 20              | 2    | 0.16667   | 1.7917          | 1            | 0.39132  | 0.41        | 0.03237 |
| Pyrimidine metabolism                               | 60              | 1    | 0.20545   | 1.5825          | 1            | 0.43868  | 0.36        | 0       |
| beta-Alanine metabolism                             | 28              | 3    | 0.20738   | 1.5732          | 1            | 0.43868  | 0.36        | 0.01119 |
| Lysine degradation                                  | 47              | 3    | 0.21122   | 1.5549          | 1            | 0.43868  | 0.36        | 0.14675 |
| Arginine and proline metabolism                     | 77              | 8    | 0.24481   | 1.4073          | 1            | 0.48962  | 0.31        | 0.41398 |
| Methane metabolism                                  | 34              | 3    | 0.27121   | 1.3049          | 1            | 0.51615  | 0.29        | 0.05444 |
| Phenylalanine, tyrosine and tryptophan biosynthesis | 27              | 3    | 0.279     | 1.2765          | 1            | 0.51615  | 0.29        | 0.008   |
| Glyoxylate and dicarboxylate metabolism             | 50              | 4    | 0.29044   | 1.2364          | 1            | 0.51615  | 0.29        | 0.02984 |
| Nitrogen metabolism                                 | 39              | 10   | 0.30007   | 1.2037          | 1            | 0.51615  | 0.29        | 0.0083  |

|                                             |     |    |         |         |   |         |      |         |
|---------------------------------------------|-----|----|---------|---------|---|---------|------|---------|
| Butanoate metabolism                        | 40  | 4  | 0.31418 | 1.1578  | 1 | 0.51615 | 0.29 | 0.10672 |
| Lysine biosynthesis                         | 32  | 4  | 0.31542 | 1.1538  | 1 | 0.51615 | 0.29 | 0.15084 |
| Aminoacyl-tRNA biosynthesis                 | 75  | 18 | 0.33769 | 1.0856  | 1 | 0.51927 | 0.28 | 0.22536 |
| Thiamine metabolism                         | 24  | 2  | 0.34435 | 1.0661  | 1 | 0.51927 | 0.28 | 0       |
| Citrate cycle (TCA cycle)                   | 20  | 5  | 0.34726 | 1.0577  | 1 | 0.51927 | 0.28 | 0.17318 |
| Biotin metabolism                           | 11  | 1  | 0.3558  | 1.0334  | 1 | 0.51927 | 0.28 | 0       |
| D-Glutamine and D-glutamate metabolism      | 11  | 2  | 0.36666 | 1.0033  | 1 | 0.52104 | 0.28 | 0.13904 |
| Tyrosine metabolism                         | 76  | 3  | 0.41191 | 0.88696 | 1 | 0.56457 | 0.25 | 0.04724 |
| Cyanoamino acid metabolism                  | 16  | 4  | 0.43582 | 0.83053 | 1 | 0.56457 | 0.25 | 0       |
| Alanine, aspartate and glutamate metabolism | 24  | 7  | 0.44031 | 0.82028 | 1 | 0.56457 | 0.25 | 0.75404 |
| Phenylalanine metabolism                    | 45  | 4  | 0.44315 | 0.81385 | 1 | 0.56457 | 0.25 | 0.11906 |
| Selenoamino acid metabolism                 | 22  | 1  | 0.49087 | 0.71159 | 1 | 0.56457 | 0.25 | 0       |
| Starch and sucrose metabolism               | 50  | 1  | 0.49139 | 0.71052 | 1 | 0.56457 | 0.25 | 0.01703 |
| Galactose metabolism                        | 41  | 1  | 0.49139 | 0.71052 | 1 | 0.56457 | 0.25 | 0.00276 |
| Pentose phosphate pathway                   | 32  | 1  | 0.49139 | 0.71052 | 1 | 0.56457 | 0.25 | 0       |
| Amino sugar and nucleotide sugar metabolism | 88  | 1  | 0.49139 | 0.71052 | 1 | 0.56457 | 0.25 | 0       |
| Primary bile acid biosynthesis              | 47  | 1  | 0.51602 | 0.6616  | 1 | 0.58053 | 0.24 | 0.00822 |
| Glycine, serine and threonine metabolism    | 48  | 5  | 0.54352 | 0.60969 | 1 | 0.59898 | 0.22 | 0.42039 |
| Sphingolipid metabolism                     | 25  | 1  | 0.58147 | 0.54219 | 1 | 0.61568 | 0.21 | 0       |
| Sulfur metabolism                           | 18  | 1  | 0.58147 | 0.54219 | 1 | 0.61568 | 0.21 | 0       |
| Porphyrin and chlorophyll metabolism        | 104 | 3  | 0.59755 | 0.51492 | 1 | 0.62032 | 0.21 | 0       |
| Cysteine and methionine metabolism          | 56  | 4  | 0.60883 | 0.49621 | 1 | 0.62032 | 0.21 | 0.05003 |
| Histidine metabolism                        | 44  | 3  | 0.62887 | 0.46384 | 1 | 0.62887 | 0.20 | 0.14039 |

**Table S8. Pathway Analysis of liver tissue comparing control with CPB-resuscitation.**

| Pathways                                    | Total Compounds | Hits | Raw p    | neg log p-value | Holm adjust. | FDR     | neg log FDR | Impact  |
|---------------------------------------------|-----------------|------|----------|-----------------|--------------|---------|-------------|---------|
| Fatty acid metabolism                       | 50              | 3    | 0.01064  | 4.5431          | 0.57458      | 0.16246 | 0.79        | 0.2426  |
| Synthesis and degradation of ketone bodies  | 6               | 1    | 0.014841 | 4.2104          | 0.78657      | 0.16246 | 0.79        | 0       |
| Inositol phosphate metabolism               | 39              | 1    | 0.014841 | 4.2104          | 0.78657      | 0.16246 | 0.79        | 0       |
| Terpenoid backbone biosynthesis             | 33              | 1    | 0.014841 | 4.2104          | 0.78657      | 0.16246 | 0.79        | 0       |
| Glycolysis or Gluconeogenesis               | 31              | 2    | 0.015043 | 4.1968          | 0.78657      | 0.16246 | 0.79        | 0.04202 |
| Fatty acid elongation in mitochondria       | 27              | 2    | 0.024819 | 3.6962          | 1            | 0.22337 | 0.65        | 0.26765 |
| Tryptophan metabolism                       | 79              | 2    | 0.029732 | 3.5155          | 1            | 0.22936 | 0.64        | 0.10853 |
| Pyruvate metabolism                         | 32              | 2    | 0.045312 | 3.0942          | 1            | 0.30586 | 0.51        | 0.24876 |
| Glutathione metabolism                      | 38              | 5    | 0.064768 | 2.737           | 1            | 0.36958 | 0.43        | 0.02214 |
| Purine metabolism                           | 92              | 7    | 0.068441 | 2.6818          | 1            | 0.36958 | 0.43        | 0.14975 |
| Nicotinate and nicotinamide metabolism      | 44              | 4    | 0.085561 | 2.4585          | 1            | 0.39219 | 0.41        | 0.0015  |
| Lysine biosynthesis                         | 32              | 4    | 0.087153 | 2.4401          | 1            | 0.39219 | 0.41        | 0.15084 |
| D-Arginine and D-ornithine metabolism       | 8               | 2    | 0.10233  | 2.2795          | 1            | 0.40591 | 0.39        | 0       |
| Glyoxylate and dicarboxylate metabolism     | 50              | 4    | 0.10563  | 2.2478          | 1            | 0.40591 | 0.39        | 0.02984 |
| Taurine and hypotaurine metabolism          | 20              | 2    | 0.11275  | 2.1825          | 1            | 0.40591 | 0.39        | 0.03237 |
| Propanoate metabolism                       | 35              | 3    | 0.12048  | 2.1163          | 1            | 0.40662 | 0.39        | 0.05474 |
| Fatty acid biosynthesis                     | 49              | 6    | 0.12968  | 2.0427          | 1            | 0.40754 | 0.39        | 0.0218  |
| Butanoate metabolism                        | 40              | 4    | 0.15285  | 1.8783          | 1            | 0.40754 | 0.39        | 0.10672 |
| Citrate cycle (TCA cycle)                   | 20              | 5    | 0.16016  | 1.8316          | 1            | 0.40754 | 0.39        | 0.17318 |
| Pantothenate and CoA biosynthesis           | 27              | 3    | 0.16054  | 1.8292          | 1            | 0.40754 | 0.39        | 0.00854 |
| Riboflavin metabolism                       | 21              | 2    | 0.16108  | 1.8258          | 1            | 0.40754 | 0.39        | 0       |
| beta-Alanine metabolism                     | 28              | 3    | 0.16604  | 1.7956          | 1            | 0.40754 | 0.39        | 0.01119 |
| Valine, leucine and isoleucine degradation  | 40              | 3    | 0.20352  | 1.592           | 1            | 0.47784 | 0.32        | 0.0713  |
| Folate biosynthesis                         | 42              | 1    | 0.23501  | 1.4481          | 1            | 0.52878 | 0.28        | 0       |
| Lysine degradation                          | 47              | 3    | 0.25994  | 1.3473          | 1            | 0.56147 | 0.25        | 0.14675 |
| Methane metabolism                          | 34              | 3    | 0.29328  | 1.2266          | 1            | 0.56257 | 0.25        | 0.05444 |
| Valine, leucine and isoleucine biosynthesis | 27              | 4    | 0.29833  | 1.2095          | 1            | 0.56257 | 0.25        | 0.0265  |
| Tyrosine metabolism                         | 76              | 3    | 0.31333  | 1.1605          | 1            | 0.56257 | 0.25        | 0.04724 |
| Starch and sucrose metabolism               | 50              | 1    | 0.34847  | 1.0542          | 1            | 0.56257 | 0.25        | 0.01703 |
| Galactose metabolism                        | 41              | 1    | 0.34847  | 1.0542          | 1            | 0.56257 | 0.25        | 0.00276 |
| Pentose phosphate pathway                   | 32              | 1    | 0.34847  | 1.0542          | 1            | 0.56257 | 0.25        | 0       |



|                                                     |     |    |         |         |   |         |      |         |
|-----------------------------------------------------|-----|----|---------|---------|---|---------|------|---------|
| Amino sugar and nucleotide sugar metabolism         | 88  | 1  | 0.34847 | 1.0542  | 1 | 0.56257 | 0.25 | 0       |
| Arginine and proline metabolism                     | 77  | 8  | 0.3494  | 1.0515  | 1 | 0.56257 | 0.25 | 0.41398 |
| Phenylalanine metabolism                            | 45  | 4  | 0.36201 | 1.0161  | 1 | 0.56257 | 0.25 | 0.11906 |
| Pyrimidine metabolism                               | 60  | 1  | 0.36703 | 1.0023  | 1 | 0.56257 | 0.25 | 0       |
| Alanine, aspartate and glutamate metabolism         | 24  | 7  | 0.37505 | 0.98071 | 1 | 0.56257 | 0.25 | 0.75404 |
| Selenoamino acid metabolism                         | 22  | 1  | 0.40696 | 0.89904 | 1 | 0.59394 | 0.23 | 0       |
| Nitrogen metabolism                                 | 39  | 10 | 0.45861 | 0.77955 | 1 | 0.64116 | 0.19 | 0.0083  |
| D-Glutamine and D-glutamate metabolism              | 11  | 2  | 0.46306 | 0.76989 | 1 | 0.64116 | 0.19 | 0.13904 |
| Histidine metabolism                                | 44  | 3  | 0.51073 | 0.67191 | 1 | 0.66771 | 0.18 | 0.14039 |
| alpha-Linolenic acid metabolism                     | 29  | 1  | 0.51908 | 0.6557  | 1 | 0.66771 | 0.18 | 0.20335 |
| Aminoacyl-tRNA biosynthesis                         | 75  | 18 | 0.51933 | 0.65521 | 1 | 0.66771 | 0.18 | 0.22536 |
| Cysteine and methionine metabolism                  | 56  | 4  | 0.56733 | 0.56681 | 1 | 0.70514 | 0.15 | 0.05003 |
| Primary bile acid biosynthesis                      | 47  | 1  | 0.58115 | 0.54275 | 1 | 0.70514 | 0.15 | 0.00822 |
| Cyanoamino acid metabolism                          | 16  | 4  | 0.58762 | 0.53167 | 1 | 0.70514 | 0.15 | 0       |
| Thiamine metabolism                                 | 24  | 2  | 0.64893 | 0.43243 | 1 | 0.75685 | 0.12 | 0       |
| Porphyrin and chlorophyll metabolism                | 104 | 3  | 0.6657  | 0.40692 | 1 | 0.75685 | 0.12 | 0       |
| Glycine, serine and threonine metabolism            | 48  | 5  | 0.67276 | 0.39637 | 1 | 0.75685 | 0.12 | 0.42039 |
| Linoleic acid metabolism                            | 15  | 1  | 0.72639 | 0.31967 | 1 | 0.80051 | 0.10 | 0.65625 |
| Phenylalanine, tyrosine and tryptophan biosynthesis | 27  | 3  | 0.76367 | 0.26962 | 1 | 0.82214 | 0.09 | 0.008   |
| Biotin metabolism                                   | 11  | 1  | 0.77646 | 0.25301 | 1 | 0.82214 | 0.09 | 0       |
| Ubiquinone and other terpenoid-quinone biosynthesis | 36  | 1  | 0.85527 | 0.15634 | 1 | 0.87066 | 0.06 | 0       |
| Sphingolipid metabolism                             | 25  | 1  | 0.87066 | 0.1385  | 1 | 0.87066 | 0.06 | 0       |
| Sulfur metabolism                                   | 18  | 1  | 0.87066 | 0.1385  | 1 | 0.87066 | 0.06 | 0       |
